# Supplementary material for: Metallic–semiconducting transition and spin polarized–unpolarized transition in a single molecule with a negative Poisson's ratio
Source: Royal Society of Chemistry journal article supplement (doi:10.1039/d2cp00816e), 2022-01-01
Supplement: d2cp00816e1.pdf [file d2cp00816e1.pdf]

## Supporting Information

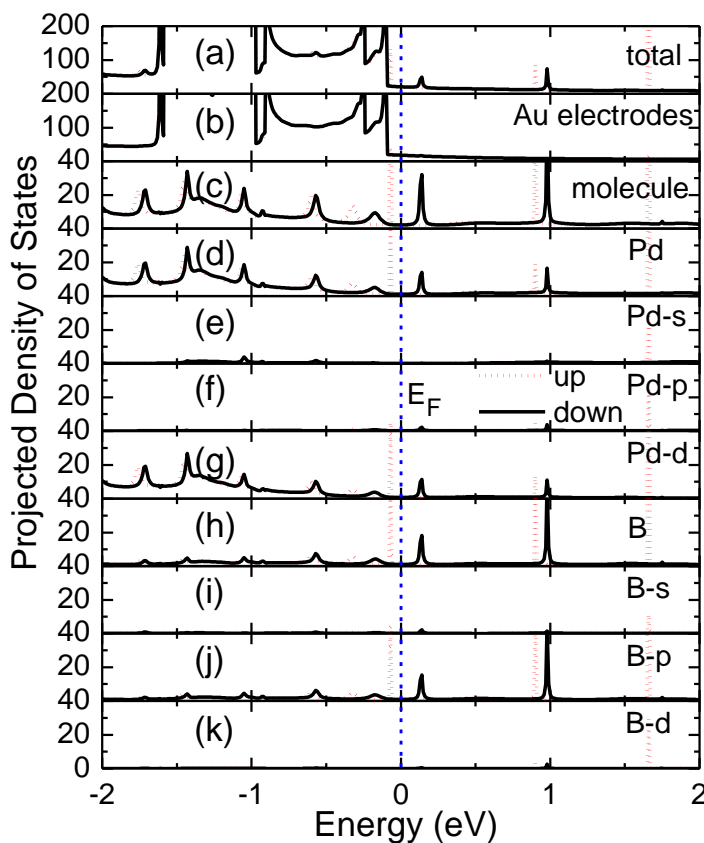

**Figure S1.** (a)-(k) The PDOS analysis of the two-probe system shown in Fig. 1(d) under 20% tensile strain along A, A120Bfree, corresponding to the transmission spectra in Fig. 5(d).

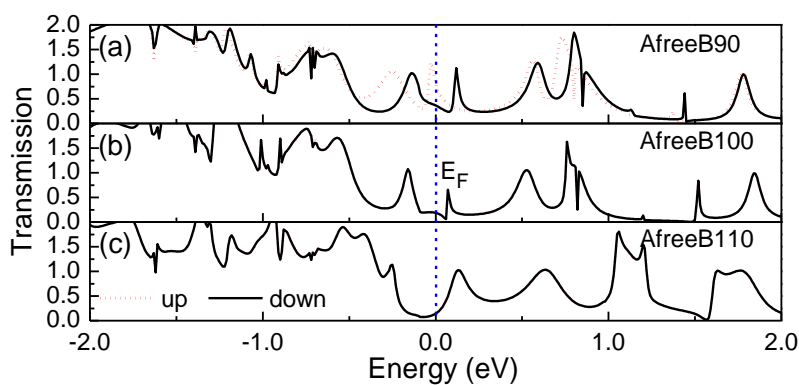

**Figure S2.** (a)-(c) Transmission spectra of Pd<sub>9</sub>B<sub>16</sub> contacted with atomic Au chain electrodes, under different strains along B.

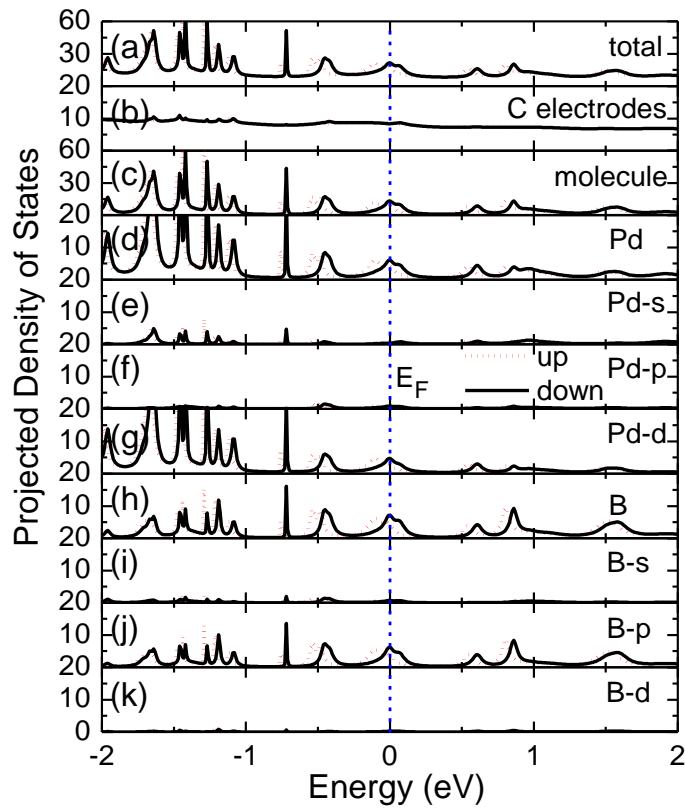

**Figure S3.** (a)-(k) The PDOS analysis of the two-probe system shown in Fig. 1(e) under 10% tensile strain along A, A110Bfree, corresponding to the transmission spectra in Fig. 6(c).

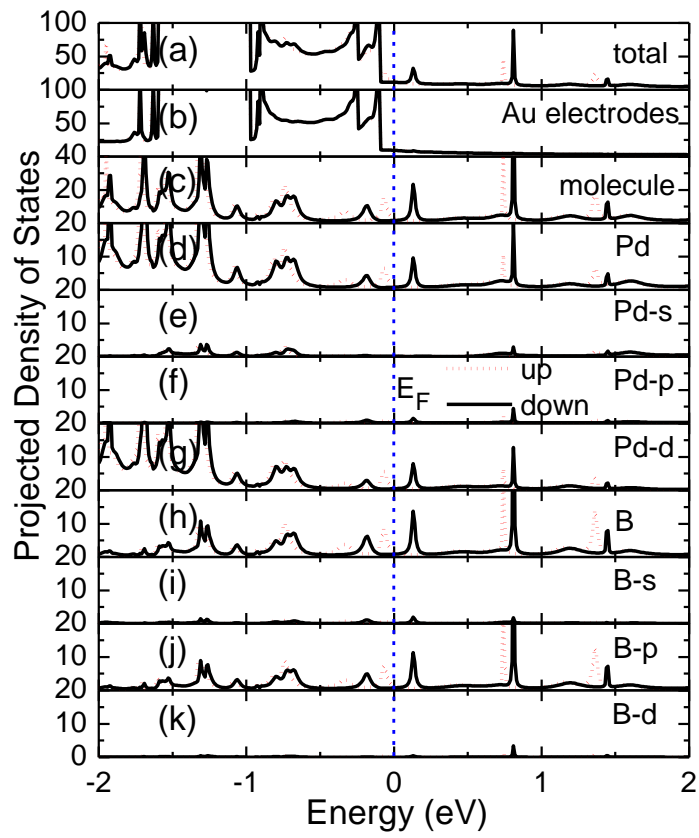

**Figure S4.** (a)-(k) The PDOS analysis of AuL1-A100Bfree-AuR2 system, where is no strain applied, corresponding to the transmission spectra in Fig. 8(b).

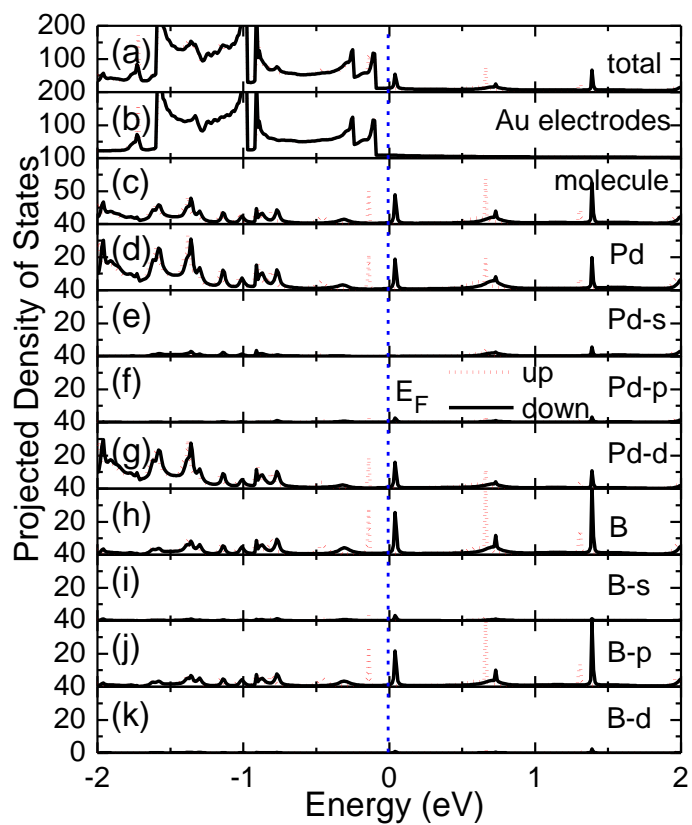

**Figure S5.** (a)-(k) The PDOS analysis of AuL1-A100Bfree-AuR3 system, where is no strain applied, corresponding to the transmission spectra in Fig. 8(c).

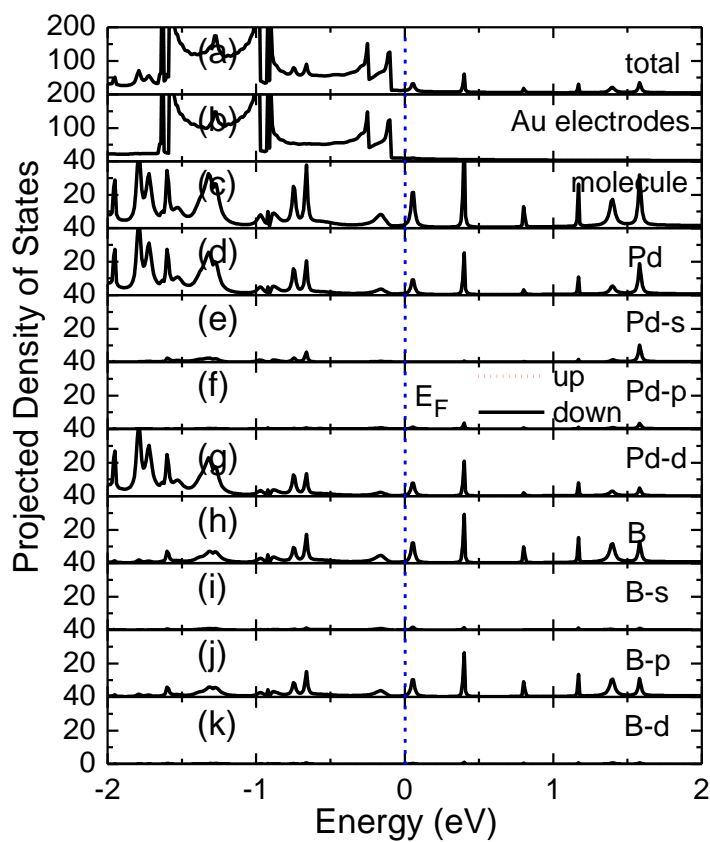

**Figure S6.** (a)-(k) The PDOS analysis of AuL2-A100Bfree-AuR2 system, where is no strain applied, corresponding to the transmission spectra in Fig. 8(d).

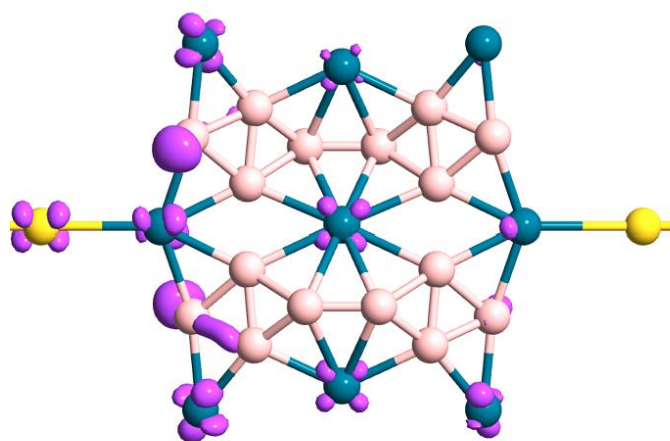

**Figure S7.** The local device density of states for AuL2-A100Bfree-AuR2 system contacted with atomic Au chain electrodes.

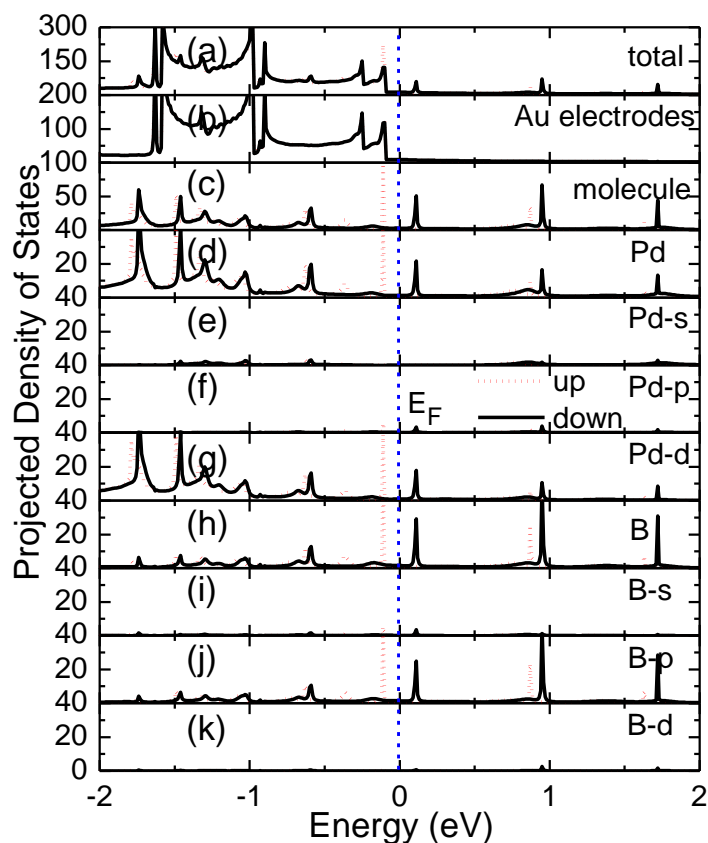

**Figure S8.** (a)-(k) The PDOS analysis of AuL1-A120Bfree-AuR3 system under 20% tensile strain along A, corresponding to the transmission spectra in Fig. 9(c).

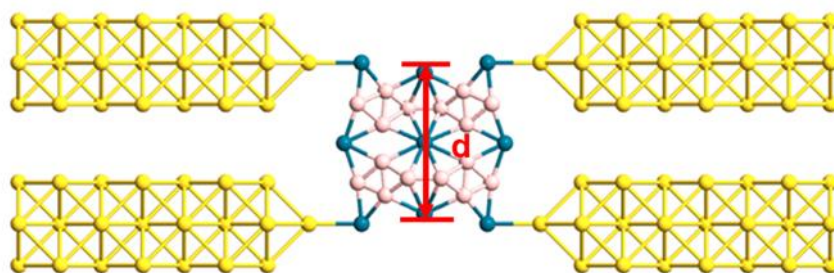

**Fig. S9.** The illustration of two-probe A100Bfree system.

**Table S1.** The lateral widths (denoted by  $d$  in Fig. S9) and variations for A100Bfree and A100Bfree systems under non dispersion correction, Grimme DFT-D2 and Grimme DFT-D3 methods, respectively.

| Configuration | vdW | $d$ (Å) | $\Delta d$ | $\Delta d/d$ |
|---------------|-----|---------|------------|--------------|
| A100Bfree     | non | 6.92    |            |              |

|           |        |      |       |        |
|-----------|--------|------|-------|--------|
|           | DFT-D2 | 6.88 | -0.04 | -0.58% |
|           | DFT-D3 | 6.95 | 0.03  | 0.43%  |
| A110Bfree | non    | 7.08 |       |        |
|           | DFT-D2 | 6.99 | -0.09 | -1.27% |
|           | DFT-D3 | 7.10 | 0.02  | 0.28%  |

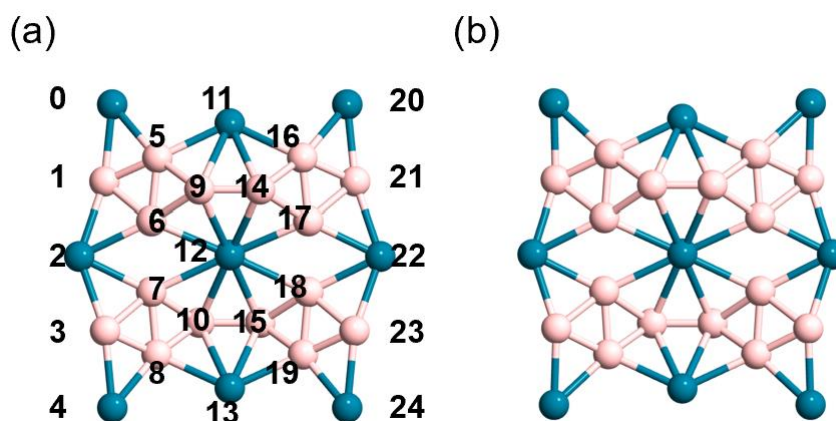

Figure S10. (a) A100Bfree (b) A110Bfree molecule.

Table S2. The bond lengths in A100Bfree and A110Bfree molecules.

| Bond               | Bond length of A100Bfree (Å) | Bond length of A110Bfree (Å) |
|--------------------|------------------------------|------------------------------|
| B <sub>0-1</sub>   | 2.04066                      | 2.01452                      |
| B <sub>1-2</sub>   | 2.10278                      | 2.08748                      |
| B <sub>5-6</sub>   | 1.65104                      | 1.66828                      |
| B <sub>9-11</sub>  | 2.27152                      | 2.2379                       |
| B <sub>9-12</sub>  | 2.24448                      | 2.24292                      |
| B <sub>0-5</sub>   | 2.03212                      | 2.06125                      |
| B <sub>1-5</sub>   | 1.66624                      | 1.66582                      |
| B <sub>1-6</sub>   | 1.7425                       | 1.73284                      |
| B <sub>2-6</sub>   | 2.11244                      | 2.12576                      |
| B <sub>5-11</sub>  | 2.12287                      | 2.15794                      |
| B <sub>5-9</sub>   | 1.66912                      | 1.675                        |
| B <sub>6-9</sub>   | 1.74882                      | 1.7573                       |
| B <sub>6-12</sub>  | 2.25994                      | 2.26797                      |
| B <sub>2-3</sub>   | 2.10451                      | 2.08918                      |
| B <sub>3-4</sub>   | 2.0407                       | 2.01682                      |
| B <sub>7-8</sub>   | 1.6502                       | 1.66682                      |
| B <sub>10-12</sub> | 2.23896                      | 2.23983                      |
| B <sub>10-13</sub> | 2.26188                      | 2.23136                      |
| B <sub>2-7</sub>   | 2.1183                       | 2.13145                      |

---

|                    |         |         |
|--------------------|---------|---------|
| B <sub>3-7</sub>   | 1.73318 | 1.72352 |
| B <sub>3-8</sub>   | 1.65768 | 1.65928 |
| B <sub>4-8</sub>   | 2.0376  | 2.06404 |
| B <sub>7-12</sub>  | 2.28256 | 2.28451 |
| B <sub>7-10</sub>  | 1.75954 | 1.76078 |
| B <sub>8-10</sub>  | 1.65986 | 1.66468 |
| B <sub>8-13</sub>  | 2.13967 | 2.17248 |
| B <sub>9-14</sub>  | 1.60782 | 1.59198 |
| B <sub>10-15</sub> | 1.5919  | 1.59469 |
| B <sub>11-14</sub> | 2.27849 | 2.23791 |
| B <sub>12-14</sub> | 2.24452 | 2.24292 |
| B <sub>16-17</sub> | 1.65104 | 1.66827 |
| B <sub>20-21</sub> | 2.04066 | 2.01453 |
| B <sub>21-22</sub> | 2.10278 | 2.08748 |
| B <sub>11-16</sub> | 2.14051 | 2.15796 |
| B <sub>14-16</sub> | 1.66913 | 1.67499 |
| B <sub>14-17</sub> | 1.76289 | 1.7573  |
| B <sub>12-17</sub> | 2.25999 | 2.26797 |
| B <sub>16-20</sub> | 2.03214 | 2.06125 |
| B <sub>16-21</sub> | 1.66623 | 1.66582 |
| B <sub>17-21</sub> | 1.74975 | 1.73283 |
| B <sub>17-22</sub> | 2.11242 | 2.12576 |
| B <sub>12-15</sub> | 2.23898 | 2.23983 |
| B <sub>13-15</sub> | 2.26191 | 2.23135 |
| B <sub>18-19</sub> | 1.6502  | 1.66682 |
| B <sub>22-23</sub> | 2.10455 | 2.08917 |
| B <sub>23-24</sub> | 2.04075 | 2.01682 |
| B <sub>12-18</sub> | 2.28258 | 2.28451 |
| B <sub>15-18</sub> | 1.75953 | 1.76076 |
| B <sub>15-19</sub> | 1.65987 | 1.66468 |
| B <sub>13-19</sub> | 2.13976 | 2.17243 |
| B <sub>18-22</sub> | 2.11825 | 2.13145 |
| B <sub>18-23</sub> | 1.73322 | 1.72352 |
| B <sub>19-23</sub> | 1.65766 | 1.67138 |
| B <sub>19-24</sub> | 2.03768 | 2.06406 |

---



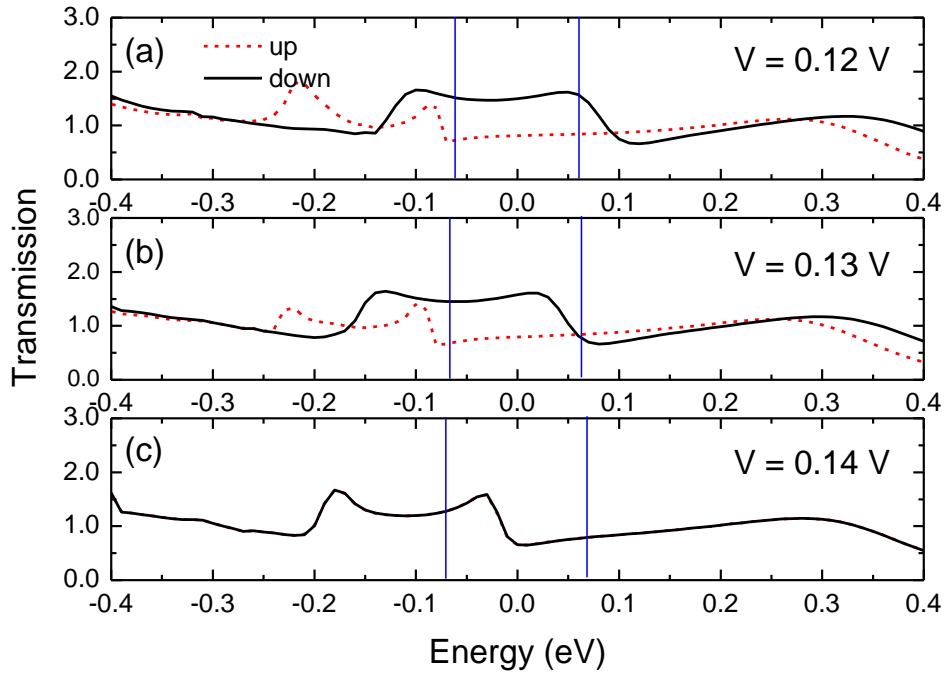

**Fig. S11.** (a)-(c) The transmission spectra for the two-probe system of A130Bfree under the biases of 0.12, 0.13 and 0.14 V, respectively.

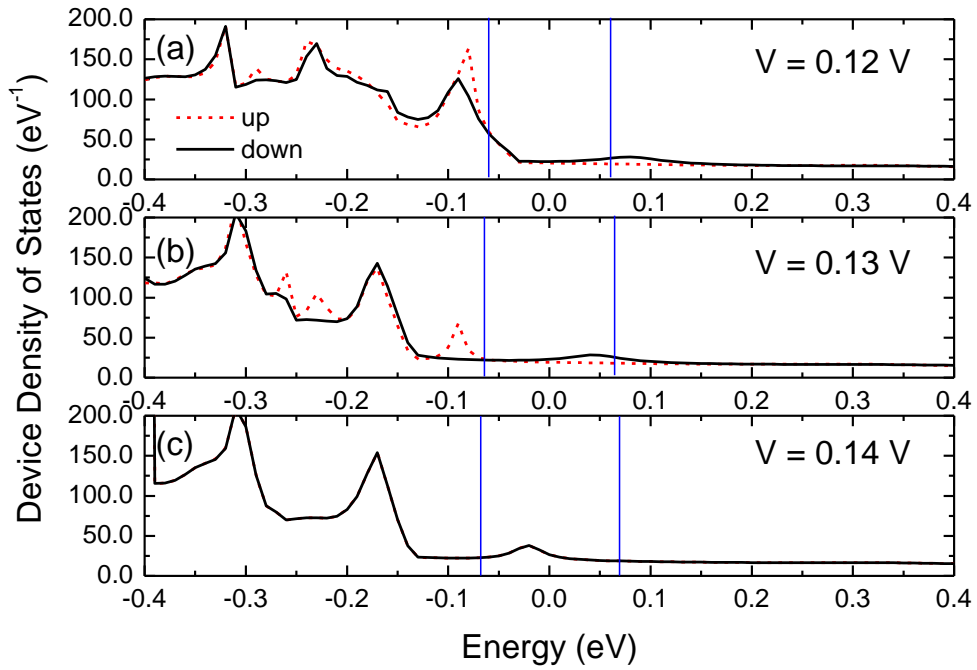

**Fig. S12.** (a)-(c) The device density of states for the two-probe system of A130Bfree under the biases of 0.12, 0.13 and 0.14 V, respectively.

The coordinates of the optimized A90Bfree, A100Bfree, A110Bfree, A120Bfree and A133Bfree configurations.

## A90Bfree

---

```
# Define elements
```

```
elements = [Palladium, Palladium, Palladium, Palladium, Palladium, Palladium,  
            Palladium, Palladium, Palladium, Boron, Boron, Boron, Boron, Boron,  
            Boron, Boron, Boron, Boron, Boron, Boron, Boron, Boron, Boron,  
            Boron, Boron]
```

```
# Define coordinates
```

```
cartesian_coordinates = [[-2.772259515294,    3.944814310597,   -0.811362029537],  
                        [-2.769559887262,    -3.883732430042,    0.859305892855],  
                        [ 0.000101615856,     0.181106089331,   -0.251329574500],  
                        [ 2.772133437740,     3.946653032583,   -0.810182100480],  
                        [ 2.769745821773,    -3.880815859953,    0.859261188450],  
                        [-3.941274182180,     0.036627376764,    0.039446874839],  
                        [-0.000579191058,     3.427648360818,    0.037539437111],  
                        [ 0.003068201480,    -3.312947968803,    0.067592698342],  
                        [ 3.942229600841,     0.039623017223,    0.040339938282],  
                        [-3.224464871366,     1.965097567985,   -0.456889412768],  
                        [ 0.800565555632,    -1.650918125007,   -1.233962286182],  
                        [-0.798824216743,    -1.651773024314,   -1.232963403617],  
                        [ 3.224282338138,     1.966828932523,   -0.456923565877],  
                        [-3.203238180943,    -1.908476305845,    0.465788246393],  
                        [ 0.793465660029,     1.643419363010,    1.272538580311],  
                        [-0.793793549166,     1.642786860599,    1.272854083317],  
                        [ 3.204441591003,    -1.906247775126,    0.465937960785],  
                        [-1.931905936227,    -2.504809404528,   -0.387957796529],  
                        [ 2.065760245766,     0.913030071565,    0.345971601819],  
                        [-1.850055141290,     2.535517099464,    0.303737849968],  
                        [ 2.076550949241,    -0.870385846571,   -0.335259289773],  
                        [-2.075109037139,    -0.872681876657,   -0.335176982207],  
                        [ 1.849389604437,     2.536548506182,    0.303521219983],  
                        [-2.065832916330,     0.911872256916,    0.346507431254],  
                        [ 1.937011180598,    -2.502860041178,   -0.392348543019]]
```

```
*Angstrom
```

## A100Bfree

---

# Define elements

```
elements = [Palladium, Palladium, Palladium, Palladium, Palladium, Palladium,  
            Palladium, Palladium, Palladium, Boron, Boron, Boron, Boron, Boron,  
            Boron, Boron, Boron, Boron, Boron, Boron, Boron, Boron, Boron,  
            Boron, Boron]
```

# Define coordinates

```
cartesian_coordinates = [[-3.080288350327,    3.983166540838,   -0.630335716564],  
                        [-3.077288763624,   -3.949398596452,    0.637711557392],  
                        [ 0.000013356201,    0.05804765303 ,   -0.061018124179],  
                        [ 3.080148264156,    3.983289135038,   -0.630395914833],  
                        [ 3.077495357526,   -3.949401057525,    0.637768474237],  
                        [-3.944876040381,    0.020060270691,    0.026975621280],  
                        [-0.000017841979,    3.485586972030,   -0.049586394776],  
                        [ 0.000048947178,   -3.434159342012,    0.058215849428],  
                        [ 3.944875180421,    0.020180371255,    0.026926427119],  
                        [-3.285143384945,    1.962068841745,   -0.436735163013],  
                        [ 0.796017626907,   -1.713350584315,   -1.175275553426],  
                        [-0.795879002818,   -1.713372828533,   -1.175270018038],  
                        [ 3.285120448673,    1.962207293273,   -0.436678119143],  
                        [-3.266588267038,   -1.925797141799,    0.454198302245],  
                        [ 0.794018620512,    1.749916519951,    1.181967607431],  
                        [-0.794049115602,    1.749865983455,    1.181921783946],  
                        [ 3.266697283831,   -1.925739096060,    0.454259490239],  
                        [-1.917851653379,   -2.548434075471,   -0.281418954350],  
                        [ 2.056759866278,    0.939143108731,    0.256805198118],  
                        [-1.898138015510,    2.582442531702,    0.247165846806],  
                        [ 2.060399535681,   -0.904518213929,   -0.257088219007],  
                        [-2.060325415123,   -0.904578205622,   -0.257117718330],  
                        [ 1.898090852331,    2.582513989883,    0.247189789614],  
                        [-2.056734952217,    0.939069554059,    0.256666630324],  
                        [ 1.918023297410,   -2.548387378524,   -0.281420529997]]
```

\*Angstrom

## A110Bfree

---

# Define elements

```
elements = [Palladium, Palladium, Palladium, Palladium, Palladium, Palladium,  
            Palladium, Palladium, Palladium, Boron, Boron, Boron, Boron, Boron,  
            Boron, Boron, Boron, Boron, Boron, Boron, Boron, Boron, Boron,  
            Boron, Boron]
```

# Define coordinates

```
cartesian_coordinates = [[-3.38831718536,      3.975908656872,    -0.442574599492],  
                        [-3.385017639986,     -3.940990921368,     0.460587211005],  
                        [ 0.000023990479,      0.039129849385,    -0.044801844821],  
                        [ 3.388163090572,      3.976042817963,    -0.442602773093],  
                        [ 3.385244893279,     -3.940864015299,     0.460592384973],  
                        [-3.949776991882,      0.022091473926,     0.033931809611],  
                        [-0.000052407785,      3.568448999826,    -0.087481633674],  
                        [ 0.000111375671,     -3.508909104106,     0.110685546834],  
                        [ 3.949826902484,      0.022232533338,     0.033932101656],  
                        [-3.340447284754,      1.961962934495,    -0.438480682342],  
                        [ 0.797414153557,     -1.788338127889,    -1.065271508413],  
                        [-0.797276268614,     -1.788372297772,    -1.065284639959],  
                        [ 3.340410025697,      1.962087545205,    -0.438468433742],  
                        [-3.322765977789,     -1.925131350559,     0.45800890576 ],  
                        [ 0.795975639413,      1.820619764803,     1.061286656399],  
                        [-0.796006939521,      1.820596002535,     1.061274762915],  
                        [ 3.322899605586,     -1.925005589420,     0.458030882147],  
                        [-1.952226185712,     -2.603364118826,    -0.186053437940],  
                        [ 2.054496648011,      0.974693543327,     0.173242101389],  
                        [-1.933511664918,      2.638232053900,     0.143027168603],  
                        [ 2.059778201457,     -0.939956629678,    -0.178153018857],  
                        [-2.059694246573,     -0.940031266667,    -0.178179682748],  
                        [ 1.933454961849,      2.638293696584,     0.143053187062],  
                        [-2.054483814177,      0.974619010026,     0.173214051116],  
                        [ 1.952363954563,     -2.603293238132,    -0.186010481836]]
```

\*Angstrom

## A120Bfree

---

# Define elements

```
elements = [Palladium, Palladium, Palladium, Palladium, Palladium, Palladium,  
            Palladium, Palladium, Palladium, Boron, Boron, Boron, Boron, Boron,  
            Boron, Boron, Boron, Boron, Boron, Boron, Boron, Boron, Boron,  
            Boron, Boron]
```

# Define coordinates

```
cartesian_coordinates = [[-3.696346020392,      3.900808778156,    -0.269984726782],  
                        [-3.692746516349,      -3.863463840332,    0.269554251785],  
                        [ 0.000036587692,        0.018400242201,    -0.000305670245],  
                        [ 3.696177916987,        3.900937820919,    -0.269983795333],  
                        [ 3.692994429031,      -3.863273579829,    0.269482826019],  
                        [-3.94918082791 ,         0.016828706808,    0.041823038534],  
                        [-0.000101206912,        3.594849897802,    -0.219891080697],  
                        [ 0.000040022984,      -3.551409292487,    0.194753281313],  
                        [ 3.949240590121,        0.016970244834,    0.041838331249],  
                        [-3.378949208111,        1.945984655876,    -0.461020431877],  
                        [ 0.798728088327,      -1.853651758334,    -0.961744271756],  
                        [-0.798544737834,      -1.853684174337,    -0.961775410358],  
                        [ 3.378890571906,        1.946189322809,    -0.460957359397],  
                        [-3.351302662436,      -1.916262182893,    0.492798276949],  
                        [ 0.798551278108,        1.899837377994,    0.938375437356],  
                        [-0.798649061539,        1.899731313007,    0.938390786425],  
                        [ 3.351421528571,      -1.916115630446,    0.492851347071],  
                        [-1.999759393793,      -2.658833108506,    -0.117353204435],  
                        [ 2.054108112420,        1.007818164888,    0.099970298925],  
                        [-1.998384303754,        2.696331814673,    0.078369498023],  
                        [ 2.052872414618,      -0.970056620993,    -0.103484803880],  
                        [-2.052832115211,      -0.970111614641,    -0.103497019629],  
                        [ 1.998316335261,        2.696416481063,    0.078349418937],  
                        [-2.054148050127,        1.007716474038,    0.099956965316],  
                        [ 1.999841339849,      -2.658766138815,    -0.117327585330]]
```

\*Angstrom

## A130Bfree

---

# Define elements

```
elements = [Palladium, Palladium, Palladium, Palladium, Palladium, Palladium,  
            Palladium, Palladium, Palladium, Boron, Boron, Boron, Boron, Boron,  
            Boron, Boron, Boron, Boron, Boron, Boron, Boron, Boron, Boron,  
            Boron, Boron]
```

# Define coordinates

```
cartesian_coordinates = [[-4.004374855425,      3.680991077539,    -0.116991582726],  
                        [-4.000475392711,      -3.636998855373,    0.077283348568],  
                        [-0.001002428243,      0.022649941808,    0.008648132085],  
                        [ 4.004192743403,      3.679249941097,    -0.117666614311],  
                        [ 4.000743964784,      -3.633921252503,    0.077143376538],  
                        [-3.960539435493,      0.013492113627,    0.102686661305],  
                        [-0.00057577738 ,      3.555291894443,    -0.327265264040],  
                        [-0.000044859043,      -3.495773887098,    0.315283243347],  
                        [ 3.960103826247,      0.013422168676,    0.101403523292],  
                        [-3.363440237947,      1.875193534304,    -0.542791279369],  
                        [ 0.800803451205,      -1.889379962921,    -0.908420572182],  
                        [-0.801682468238,      -1.889776474849,    -0.908640211385],  
                        [ 3.36174347576 ,      1.874322433701,    -0.544886777401],  
                        [-3.307890755583,      -1.874565532328,    0.621582133458],  
                        [ 0.801227345386,      1.947354861502,    0.889853084399],  
                        [-0.80183799122 ,      1.947339120172,    0.890493837136],  
                        [ 3.306234781746,      -1.873200164314,    0.623180626099],  
                        [-2.063426241037,      -2.659000729634,    -0.128498101768],  
                        [ 2.035083040655,      0.994225487298,    0.079939280112],  
                        [-2.056422323169,      2.704481431398,    0.058315951573],  
                        [ 2.029074173217,      -0.955129034581,    -0.020039941231],  
                        [-2.030365637476,      -0.955970400716,    -0.020109011671],  
                        [ 2.055627284290,      2.703910674959,    0.057596915552],  
                        [-2.036416241524,      0.994478034122,    0.080960048104],  
                        [ 2.062730343784,      -2.658149204532,    -0.127745443883]]
```

\*Angstrom
